# Supplementary material
Source: PubMed Central journal article supplement (PMC7476802)
Supplement: NIHMS1625033-supplement-Supplemental_Appendix.pdf [file NIHMS1625033-supplement-Supplemental_Appendix.pdf]

# Supplementary Appendix

**S Zeng, A Tham, B Bos, J Jin, B Giang, M Arjomandi.** Lung Volume Indices Predict Morbidity in Smokers with Preserved Spirometry.

---

|                                                             |           |
|-------------------------------------------------------------|-----------|
| <b>1. AUTHOR CONTRIBUTIONS .....</b>                        | <b>2</b>  |
| <b>2. ACKNOWLEDGEMENTS .....</b>                            | <b>3</b>  |
| <b>3. DETAILED INCLUSION AND EXCLUSION CRITERIA .....</b>   | <b>4</b>  |
| INCLUSION CRITERIA .....                                    | 4         |
| EXCLUSION CRITERIA.....                                     | 4         |
| ICD CODES USED <sup>1</sup> .....                           | 4         |
| <b>4. VA SITES FROM WHERE PFT DATA WERE AVAILABLE .....</b> | <b>7</b>  |
| <b>5. SUPPLEMENTAL TABLES.....</b>                          | <b>9</b>  |
| <b>6. DETAILED DEFINITION OF OUTCOMES.....</b>              | <b>28</b> |
| OUTCOMES.....                                               | 28        |
| MEDICATION CATEGORIES.....                                  | 28        |
| <b>7. REFERENCES .....</b>                                  | <b>30</b> |

# 1. Author Contributions

## Authors

Siyang Zeng, MS<sup>1,2</sup> \*, Andrea Tham, BA<sup>1,2,3</sup> \*, Bruce Bos, MD<sup>1,2,4</sup>, Joan Jin, BA<sup>1,2,5</sup>, Brian Giang, BA<sup>1</sup>, Mehrdad Arjomandi, MD<sup>1,2</sup>

1. San Francisco Veterans Affairs Medical Center, San Francisco, California, USA
2. Department of Medicine, University of California, San Francisco, California, USA
3. School of Medicine, University of Southern California, Los Angeles, California, USA
4. Radboud University Medical Center, Nijmegen, the Netherlands
5. School of Pharmacy, University of Illinois at Chicago, Chicago, IL, USA

\* These authors contributed equally to this work.

## Authors' Contributions

Conceived and designed the study: MA.

Developed study protocols: MA, BB, SZ.

Collected data: SZ, BB, BG, JJ, MA.

Analyzed and interpreted data: SZ, MA, AT, BB, JJ.

Prepared the manuscript: MA, AT, SZ, BB, JJ.

Obtained funding: MA, BB.

## 2. Acknowledgements

### Funding

This work was supported by:

1. Flight Attendant Medical Research Institute (Arjomandi)
2. Radboud University School of Medicine Scholarship (Bos)

The funder had no role in study design, data collection and analysis, decision to publish, or preparation of the manuscript. The statements and conclusions in this publication are those of the authors and not necessarily those of the funding agency. The mention of commercial products, their source, or their use in connection with the material reported herein is not to be construed as an actual or implied endorsement of such products.

### Other Support

VINCI Concierge:

Radhakrishnan, Sundaragandhi P.

Potter, James M.

### Conflict of Interests

Authors disclose no financial conflict of interest.

### 3. Detailed Inclusion and Exclusion Criteria

#### Inclusion criteria

Patients eligible for analyses in the study met all the following criteria:

1. Had done at least one full pulmonary function tests with measurement of pre- and post-bronchodilator spirometry (FEV<sub>1</sub> and FVC), and plethysmographic measurement of lung volumes (RV and TLC).
2. 40 years of age or older at the time of the index (earliest) full PFT.
3. Have ever had a clinical diagnosis of smoking tobacco or documented to be a smoker on their index full PFT.

#### Exclusion criteria

Patients meeting any of the following criteria were not included in the analyses:

1. Restrictive lung diseases: TLC <lower limit of normal (LLN) or TLC <80% predicted.
2. Interstitial lung diseases: ILD or Cystic Fibrosis (by ICD codes provided below).
3. Allergic lung diseases: AERD or ABPA (by ICD codes provided below).
4. Lung cancers: (by ICD codes provided below).
5. Did not have preserved spirometry at index PFT: post-bronchodilator FEV<sub>1</sub>/FVC <LLN or post-bronchodilator FEV<sub>1</sub> <LLN.

#### ICD codes used<sup>1</sup>

##### Diagnosis of COPD

- Chronic obstructive Lung Disease: ICD9: 496
- Chronic bronchitis: ICD9: 491.xx
- Pulmonary emphysema: ICD9: 492.x
- Chronic bullous emphysema: ICD9: 429.0
- COPD: ICD10: J44.0, J44.1 and J44.9
- Chronic bronchitis: ICD10: J41.0, J41.1 and J41.8
- Pulmonary emphysema: ICD10: J43.0, J43.1, J43.2, J43.8 and J43.9

##### Diagnosis of tobacco smoking or tobacco use

- Tobacco use disorder: ICD-9 305.1
- History of tobacco use: ICD-9 V15.82
- Tobacco: ICD-9 989.84
- Smoking cessation counseling: ICD-9 V65.42
- Tobacco Use: ICD-10 Z72.0
- Tobacco Abuse Counseling: ICD-10 Z71.6
- Nicotine dependence, cigarettes: ICD-10 F17.21
- Nicotine dependence, other tobacco product: ICD-10 F17.29
- Nicotine dependence, unspecified: ICD-10 F17.20

- Personal History of Nicotine Dependence: ICD-10 Z87.891

#### Diagnosis of asthma

- Asthma: ICD9: 493.xx (493.1 was excluded)
- Bronchospasm: ICD9: 519.11
- Asthma: ICD10: J45.909, J45.998
- Unspecified asthma: ICD10: J45.90
- Cough variant asthma: ICD10: J45.991
- Acute bronchospasm: ICD10: J98.01
- Moderate persistent asthma, uncomplicated: ICD10: J45.40
- Mild intermittent asthma with status asthmaticus: ICD10: J45.22
- Mild intermittent asthma, uncomplicated: ICD10: J45.20
- Unspecified asthma with status asthmaticus: ICD10: J45.902
- Unspecified asthma with (acute) exacerbation: ICD10: J45.901

#### Diagnosis of ILD

- ILD: ICD9: 518.89, 508.1, 714.81, 770.7
- Hypersensitivity pneumonitis: ICD9: 495
- Silicosis: ICD9: 502
- Asbestosis: ICD9: 501
- Berylliosis: ICD9: 503
- Sarcoidosis: ICD9: 135
- Acute interstitial pneumonitis: ICD9: 516.3
- Hamman-Rich Syndrome: ICD9: 516.3
- Post Inflammatory Pulmonary Fibrosis: ICD9: 515
- ILD: ICD10: J84.9
- Pneumoconiosis due to other dust containing silica: ICD10: J62.8
- Pneumoconiosis due to asbestos and other mineral fibers: ICD10: J61
- Berylliosis: ICD10: J63.2
- Sarcoidosis, unspecified: ICD10: D86.9
- Pulmonary fibrosis, unspecified: ICD10: J84.10
- Other specified interstitial pulmonary diseases: ICD10: J84.89
- Interstitial emphysema: ICD10: J98.2
- Respiratory bronchiolitis interstitial lung disease: ICD10: J84.848; J84.115
- Other interstitial pulmonary diseases with fibrosis in diseases classified elsewhere: ICD10: J84.17
- Acute interstitial pneumonitis: ICD10: J84.114
- Idiopathic pulmonary fibrosis: ICD10: J84.112

#### Diagnosis of AERD

- Samter's triad, Exacerbated Respiratory disease, Samter's Syndrome: ICD9: 493.1
- Other specified respiratory disorders: ICD10: J98.8

### Diagnosis of ABPA

- Allergic bronchopulmonary aspergillosis: ICD9: 518.6
- Allergic bronchopulmonary aspergillosis: ICD10: B44.81

### Cystic fibrosis

- ICD9: 277.0
- Cystic fibrosis: ICD10: E84
- Congenital cystic lung: ICD10: Q33.0

### Diagnosis of Lung Cancer

- Lung cancer: ICD9: 162, 162.2, 162.3, 162.4, 162.5, 162.8, 162.9
- Lung cancer: ICD10: C34.00, C34.10, C34.20, C34.30, C34.80, C34.90
- Malignant neoplasm of pleura: ICD9: 163
- Malignant neoplasm of pleura: ICD10: C38.4

#### 4. VA Sites From Where PFT Data Were Available

|    | (VA Station Number) VA Site Name                | No. of Patients with Records | Percentage w Abnormal RV/TLC |
|----|-------------------------------------------------|------------------------------|------------------------------|
| 1  | (402) Togus, ME                                 | 2                            | 0%                           |
| 2  | (405) White River Junction, VT                  | 20                           | 25%                          |
| 3  | (437) Fargo, ND (CACHE 5.0)                     | 120                          | 34%                          |
| 4  | (438) Sioux Falls, SD (CACHE 5.0)               | 103                          | 37%                          |
| 5  | (460) Wilmington, DE *                          | 4                            | 100%                         |
| 6  | (501) New Mexico HCS (Albuquerque, NM)          | 816                          | 42%                          |
| 7  | (503) Altoona, PA                               | 45                           | 29%                          |
| 8  | (528) Upstate New York, HCS                     | 213                          | 40%                          |
| 9  | (539) Cincinnati, OH                            | 93                           | 6%                           |
| 10 | (544) Columbia, SC                              | 2                            | 0%                           |
| 11 | (550) Illiana HCS (Danville, IL) *              | 40                           | 60%                          |
| 12 | (552) Dayton, OH                                | 500                          | 46%                          |
| 13 | (556) North Chicago, IL                         | 341                          | 18%                          |
| 14 | (561) New Jersey HCS (East Orange, NJ)          | 311                          | 21%                          |
| 15 | (581) Huntington, WV                            | 231                          | 28%                          |
| 16 | (586) Jackson, MS                               | 81                           | 16%                          |
| 17 | (589) VA Heartland West (Kansas City, MO)       | 100                          | 34%                          |
| 18 | (590) Hampton, VA                               | 115                          | 31%                          |
| 19 | (593) Southern Nevada HCS (Las Vegas, NV)       | 212                          | 24%                          |
| 20 | (596) Lexington, KY                             | 6                            | 17%                          |
| 21 | (600) Long Beach HCS (Long Beach, CA)           | 118                          | 20%                          |
| 22 | (612) Northern California HCS (Martinez, CA) *  | 1                            | 100%                         |
| 23 | (613) Martinsburg, WV                           | 8                            | 25%                          |
| 24 | (626) Tennessee Valley HCS (Nashville, TN)      | 199                          | 31%                          |
| 25 | (630) New York HHS (Brooklyn, NJ)               | 263                          | 25%                          |
| 26 | (636) Central Plains HCS (Omaha NE)             | 127                          | 24%                          |
| 27 | (640) Palo Alto HCS (Palo Alto, CA)             | 407                          | 29%                          |
| 28 | (653) Roseburg HCS (Roseburg, OR)               | 15                           | 47%                          |
| 29 | (654) Sierra Nevada HCS (Reno, NV)              | 121                          | 28%                          |
| 30 | (657) VA Heartland East (Saint Louis, MO)       | 768                          | 34%                          |
| 31 | (660) Salt Lake City HCS (Salt Lake City, UT)   | 4                            | 0%                           |
| 32 | (663) Puget Sound HCS (Seattle, WA) (CACHE 5.0) | 1,139                        | 35%                          |
| 33 | (664) San Diego HCS (San Diego, CA)             | 185                          | 16%                          |
| 34 | (673) Tampa, FL                                 | 167                          | 28%                          |
| 35 | (678) Southern Arizona HCS (Tucson, AZ)         | 2                            | 0%                           |
| 36 | (688) Washington, DC                            | 27                           | 7%                           |

|    |                                                 |       |     |
|----|-------------------------------------------------|-------|-----|
| 37 | (691) Greater Los Angeles HCS (Los Angeles, CA) | 573   | 18% |
|    | Total                                           | 7,479 | 31% |

Data from other Veterans Affairs Medical Centers were not used due to lack of availability of coded PFT data that would be obtainable through VINCI. Proportion of patients who had abnormal RV/TLC passed Shapiro-wilk normality test after removing statistics from three outlier sites, denoted with\*.



## 5. Supplemental Tables

**Table S1- Characteristics of Patients with Preserved Spirometry and Normal RV/TLC.**

| Characteristics                        | Patients with Normal RV/TLC | Patients with Low-normal RV/TLC | Patients with High-normal RV/TLC | Difference (CI 95%)  | p-value      |
|----------------------------------------|-----------------------------|---------------------------------|----------------------------------|----------------------|--------------|
| <b>Demographics</b>                    |                             |                                 |                                  |                      |              |
| N                                      | 5,179                       | 2,586                           | 2,593                            | --                   | --           |
| Age (years)                            | 60.8±10.7                   | 56.0±9.2                        | 65.6±10.0                        | -9.5 (-10.1, -9.0)   | <0.001       |
| Sex [Female n (%)]                     | 477 (9.2%)                  | 157 (6.1%)                      | 320 (12.3%)                      | -6.3% (-7.8, -4.7)   | <0.001       |
| Height (cm)                            | 174.9±7.8                   | 176.0±7.5                       | 173.8±8.0                        | 2.2 (1.8, 2.6)       | <0.001       |
| BMI (kg/m <sup>2</sup> )               | 29.5±5.7                    | 29.5±5.7                        | 29.5±5.7                         | -0.05 (-0.36, 0.26)  | 0.763        |
| Years of Follow-up                     | 8.5±4.7                     | 8.7±4.8                         | 8.2±4.7                          | 0.48 (0.22, 0.74)    | <0.001       |
| <b>Airflow Indices</b>                 |                             |                                 |                                  |                      |              |
| FEV <sub>1</sub> (L)                   | 3.18±0.59                   | 3.43±0.55                       | 2.93±0.53                        | 0.50 (0.47, 0.53)    | <0.001       |
| FEV <sub>1</sub> (% predicted)         | 90±10                       | 93±10                           | 88±9                             | 5.0 (4.5, 5.5)       | <0.001       |
| FVC (L)                                | 4.12±0.77                   | 4.41±0.72                       | 3.83±0.71                        | 0.58 (0.54, 0.62)    | <0.001       |
| FVC (% predicted)                      | 92±11                       | 95±11                           | 89±10                            | 5.13 (4.56, 5.71)    | <0.001       |
| FEV <sub>1</sub> /FVC [%]              | 77.2±4.9                    | 77.9±4.8                        | 76.6±4.9                         | 1.3 (1.1, 1.6)       | <0.001       |
| FEV <sub>1</sub> /FVC (% predicted)    | 98.5±6                      | 98.6±5.8                        | 98.5±5.9                         | 0.1 (-0.2, 0.4)      | 0.555        |
| FEF <sub>25-75</sub> (L)               | 2.93±0.97                   | 3.21±0.94                       | 2.65±0.92                        | 0.56 (0.51, 0.61)    | <0.001       |
| FEF <sub>25-75</sub> (% predicted)     | 88±25                       | 90±24                           | 85±26                            | 5.1 (3.7, 6.4)       | <0.001       |
| Reversibility in FEV <sub>1</sub> (mL) | 167.3±191.7                 | 167.6±201.9                     | 167.0±181.0                      | 0.5 (-9.9, 11.0)     | 0.919        |
| Reversibility in FEV <sub>1</sub> (%)  | 6±7                         | 5±7                             | 6±8                              | -1.0 (-1.4, -0.6)    | <0.001       |
| Reversibility [n (%)]                  | 1,929 (37.3%)               | 986 (38.1%)                     | 943 (36.4%)                      | 1.8% (-0.9, 4.4)     | 0.189        |
| <b>Lung Volume Indices</b>             |                             |                                 |                                  |                      |              |
| TLC (L)                                | 6.46±1.01                   | 6.49±0.96                       | 6.43±1.05                        | 0.06 (0.01, 0.12)    | <b>0.026</b> |
| TLC (% predicted)                      | 96±11                       | 95±10                           | 97±11                            | -1.8 (-2.4, -1.2)    | <0.001       |
| RV (L)                                 | 2.29±0.51                   | 2.00±0.40                       | 2.58±0.43                        | -0.58 (-0.60, -0.56) | <0.001       |
| RV (% predicted)                       | 104±20                      | 94±18                           | 113±16                           | -19 (-20, -18)       | <0.001       |
| FRC (L)                                | 3.34±0.77                   | 3.21±0.77                       | 3.48±0.75                        | -0.27 (-0.32, -0.23) | <0.001       |

|                                              |               |             |             |                      |                  |
|----------------------------------------------|---------------|-------------|-------------|----------------------|------------------|
| FRC (% predicted)                            | 96±19         | 92±20       | 100±18      | -8 (-9, -7)          | <b>&lt;0.001</b> |
| FRC/TLC (%)                                  | 52±9          | 50±9        | 54±8        | -4.7 (-5.2, -4.2)    | <b>&lt;0.001</b> |
| FRC/TLC (% predicted)                        | 92±15         | 89±16       | 95±13       | -5.3 (-6.1, -4.4)    | <b>&lt;0.001</b> |
| RV/TLC (%)                                   | 35±6          | 31±4        | 40±3        | -9.4 (-9.6, -9.2)    | <b>&lt;0.001</b> |
| RV/TLC (% predicted)                         | 106±14        | 98±13       | 115±8       | -17.4 (-17.9, -16.8) | <b>&lt;0.001</b> |
| IC (L)                                       | 3.11±0.73     | 3.26±0.73   | 2.95±0.70   | 0.32 (0.27, 0.36)    | <b>&lt;0.001</b> |
| IC (% predicted)                             | 74±15         | 74±15       | 74±15       | -0.4 (-1.3, 0.5)     | 0.355            |
| IC/TLC (%)                                   | 48±9          | 51±9        | 46±8        | 4.7 (4.2, 5.2)       | <b>&lt;0.001</b> |
| IC/TLC (% predicted)                         | 96±21         | 94±19       | 99±22       | -5.2 (-6.4, -4.0)    | <b>&lt;0.001</b> |
| <b>Follow-up Spirometry §</b>                |               |             |             |                      |                  |
| No. With Follow-up Spirometry (n[%])         | 1,124 (21.7%) | 528 (20.4%) | 596 (23.0%) | -2.6% (-4.8, -0.3)   | <b>0.025</b>     |
| Age at Follow-up Spirometry (years)          | 64.7±10.3     | 60.2±9.3    | 68.6±9.6    | -8.4 (-9.5, -7.3)    | <b>&lt;0.001</b> |
| Height at Follow-up Spirometry (cm)          | 174.9±8.1     | 175.9±7.7   | 173.9±8.3   | 2.0 (1.0, 2.9)       | <b>&lt;0.001</b> |
| Years from Index PFT to Follow-up Spirometry | 3.8±2.9       | 3.8±2.9     | 3.7±2.9     | 0.1 (-0.3, 0.4)      | 0.611            |
| FEV <sub>1</sub> (L)                         | 2.77±0.65     | 2.99±0.64   | 2.59±0.60   | 0.40 (0.33, 0.48)    | <b>&lt;0.001</b> |
| FEV <sub>1</sub> (% predicted)               | 81±15         | 83±15       | 80±15       | 3.9 (2.1, 5.6)       | <b>&lt;0.001</b> |
| FVC (L)                                      | 3.75±0.86     | 4.01±0.82   | 3.52±0.82   | 0.49 (0.39, 0.58)    | <b>&lt;0.001</b> |
| FVC (% predicted)                            | 86±15         | 88±15       | 84±15       | 4.3 (2.6, 6.1)       | <b>&lt;0.001</b> |
| FEV <sub>1</sub> /FVC [%]                    | 74±8          | 75±8        | 74±8        | 1.0 (0.1, 1.9)       | <b>0.036</b>     |
| FEV <sub>1</sub> /FVC (% predicted)          | 95±10         | 95±10       | 96±10       | -0.2 (-1.3, 1.0)     | 0.756            |
| FEF <sub>25-75</sub> (L)                     | 2.38±1.00     | 2.61±1.03   | 2.17±0.93   | 0.44 (0.32, 0.55)    | <b>&lt;0.001</b> |
| FEF <sub>25-75</sub> (% predicted)           | 75±29         | 77±29       | 73±29       | 4.0 (0.6, 7.5)       | <b>0.022</b>     |
| FEV <sub>1</sub> Decline (mL/year)           | 115±225       | 122±251     | 108±200     | 14 (-12, 41)         | 0.285            |
| FEV <sub>1</sub> Decline (% predicted/year)  | 2.72±6.52     | 2.82±6.97   | 2.63±6.09   | 0.19 (-0.57, 0.96)   | 0.617            |
| FVC Decline (mL/year)                        | 104±250       | 114±258     | 95±242      | 19 (-10, 49)         | 0.193            |
| FVC Decline (% predicted/year)               | 1.91±5.93     | 2.08±6.05   | 1.77±5.82   | 0.31 (-0.39, 1.00)   | 0.384            |
| FEV <sub>1</sub> /FVC Decline                | 0.87±3.07     | 0.81±3.30   | 0.92±2.86   | -0.11 (-0.47, 0.25)  | 0.554            |

|                                                  |            |            |            |                     |       |
|--------------------------------------------------|------------|------------|------------|---------------------|-------|
| (%/year)                                         |            |            |            |                     |       |
| FEV <sub>1</sub> /FVC Decline (% predicted/year) | 0.95±3.99  | 0.87±4.26  | 1.03±3.73  | -0.16 (-0.63, 0.31) | 0.498 |
| FEF <sub>25-75</sub> Decline (mL/year)           | 157±420    | 150±482    | 163±357    | -13 (-62, 37)       | 0.610 |
| FEF <sub>25-75</sub> Decline (% predicted/year)  | 3.94±12.52 | 3.54±13.52 | 4.29±11.56 | -0.75 (-2.23, 0.72) | 0.317 |

Footnote: Demographics and lung function in patients with preserved spirometry and normal RV/TLC. The cohort was further stratified into patients with normal and low RV/TLC and patients with normal but high RV/TLC per the median of the normal RV/TLC (35.8%). Data are presented as mean ± standard deviation or number of patients with positive value for the variable (n) out of the total number of patients (N) and percentage of patients (%) and difference (95% CI) with p-value for unadjusted comparison between normal and abnormal RV/TLC. § Follow-up spirometry (last available post-bronchodilator spirometry) was available for a subgroup of the patients. Reference equations: Measures of pulmonary function and percent predicted of normal values were calculated using Crapo predicted formulas except for FRC/TLC, IC, and IC/TLC.<sup>2</sup> Quanjer predicted formulas were used for FRC/TLC and IC and Francisco predicted formulas were used for IC/TLC.<sup>3,4</sup> Reversibility defined as ≥12% and ≥200mL increase in FEV<sub>1</sub> after bronchodilator administration. Abbreviations- PFT: pulmonary function test; BMI: body mass index; FEV<sub>1</sub>: forced expiratory volume in 1 second; FVC: forced vital capacity; FEF<sub>25-75</sub>: maximum airflow at mid-lung volume; TLC: total lung capacity; RV: residual volume; FRC: functional residual capacity; IC: inspiratory capacity.

**Table S2- Frequency of Patients with Lung Function Outside the Limits of Normal Range or Other Characteristics of Interest.**

| N=7,479                                   | <b>Patients with preserved spirometry</b> |
|-------------------------------------------|-------------------------------------------|
| RV/TLC > ULN                              | 2,300 (30.8%)                             |
| RV > ULN                                  | 1,962 (26.2%)                             |
| FRC > ULN                                 | 349 (4.7%)                                |
| FRC/TLC >ULN                              | 338 (4.5%)                                |
| IC <LLN                                   | 4,066 (54.4%)                             |
| IC/TLC <LLN                               | 1,517 (20.3%)                             |
| FVC < LLN                                 | 309 (4.1%)                                |
| FEF <sub>25-75</sub> < LLN                | 87 (1.2%)                                 |
| BMI > 30                                  | 3,093 (41.4%)                             |
| Reversibility in FEV <sub>1</sub> [n (%)] | 3,050 (40.8%)                             |
| Diagnosis of Asthma (Ever)                | 1,597 (21.4%)                             |
| Diagnosis of Asthma (Before Index PFT)    | 933 (12.5%)                               |

Footnote: Summary on frequency of patients with lung function outside the limits of normal range was shown as number of patients with positive value for the variable (n) and percentage of subjects (%). Reversibility defined as  $\geq 12\%$  and  $\geq 200\text{mL}$  increase in FEV<sub>1</sub> after bronchodilator administration. Abbreviations- ULN: upper limit of normal; LLN: lower limit of normal; RV: residual volume; TLC: total lung capacity; FRC: functional residual capacity; IC: inspiratory capacity; FVC: forced vital capacity; FEF<sub>25-75</sub>: maximum airflow at mid-lung volume.

**Table S3- Association of Healthcare Outcomes and RV/TLC Strata.**

| Respiratory-related Health Outcomes |                                   |                                   |                                   |                                   |                                   |                                   |                                   |                                      |
|-------------------------------------|-----------------------------------|-----------------------------------|-----------------------------------|-----------------------------------|-----------------------------------|-----------------------------------|-----------------------------------|--------------------------------------|
| RV/TLC                              | Clinical<br>Diagnosis of<br>COPD  | Respiratory<br>Medications        | Office Visits                     | ER Visits                         | Hospital<br>Admissions            | ICU<br>Admissions                 | Mortality                         | COPD on<br>Follow-up<br>Spirometry § |
|                                     | HR                                | IRR                               | IRR                               | IRR                               | IRR                               | IRR                               | HR                                | OR-Mixed Eff.                        |
| <b>Multi-Level Comparison</b>       |                                   |                                   |                                   |                                   |                                   |                                   |                                   |                                      |
| <b>Model</b>                        |                                   |                                   |                                   |                                   |                                   |                                   |                                   |                                      |
| Model r <sup>2</sup>                | N/A                               | 0.01                              | 0.06                              | 0.02                              | 0.04                              | 0.02                              | N/A                               | N/A                                  |
| <b>Abnormal</b>                     | <b>1.81(1.62-2.02)</b><br>p<0.001 | <b>1.14(1.12-1.15)</b><br>p<0.001 | <b>1.42(1.39-1.45)</b><br>p<0.001 | <b>1.17(1.05-1.29)</b><br>p=0.004 | <b>1.77(1.64-1.90)</b><br>p<0.001 | <b>1.45(1.17-1.79)</b><br>p=0.001 | <b>1.58(1.41-1.78)</b><br><0.001  | 1.26(0.94-1.67)<br>p=0.118           |
| <b>Normal_High</b>                  | <b>1.33(1.18-1.49)</b><br>p<0.001 | <b>1.04(1.02-1.05)</b><br>p<0.001 | <b>1.19(1.17-1.22)</b><br>p<0.001 | <b>1.12(1.01-1.24)</b><br>p=0.031 | <b>1.34(1.24-1.45)</b><br>p<0.001 | 1.16(0.93-1.45)<br>p=0.190        | <b>1.21(1.08-1.37)</b><br>p=0.002 | 0.93(0.69-1.26)<br>p=0.646           |
| <b>Normal_Low</b>                   | Ref. (1.00)                          |

Footnote: Association of RV/TLC strata and respiratory-related healthcare outcomes with COPD diagnosis were compared to the reference group (patients with normal and low RV/TLC) with interaction using Cox Proportional Hazards regression for time to outcomes, Poisson regression for counts of outcome, or mixed-effects (Mixed Eff.) logistic regression for binary outcomes with adjustment for age, sex, height, and years of follow-up: Healthcare Outcomes= $\beta_0 + \beta_1(\text{age}) + \beta_2(\text{sex}) + \beta_3(\text{height}) + \beta_4(\text{years of follow-up}) + i.\beta_*(\text{RV/TLC strata})$ . The models coefficients of determination ( $r^2$ ), Hazard Ratio (HR), Incident Rate Ratio (IRR), and Odds Ratio (OR) with 95% confidence interval and p-value of the predictors are shown in the table. Significant associations are shown in bold. N =7,479 unless noted otherwise. § Follow-up spirometry (last available post-bronchodilator spirometry) was available for a subgroup of the patients, N =1,706, models were adjusted for time from index PFT to such follow-up spirometry instead of years of follow-up. Abbreviations- TLC: total lung capacity; RV: residual volume; FEV<sub>1</sub>: forced expiratory volume in 1 second; FVC: forced vital capacity; FEF<sub>25-75</sub>: maximum airflow at mid-lung volume.

**Table S4- Association of RV/TLC and Health Outcomes in Subjects with Normal RV/TLC.**

| Respiratory-related Health Outcomes |                                  |                                                                           |                      |                      |                        |                      |                      |                                      |
|-------------------------------------|----------------------------------|---------------------------------------------------------------------------|----------------------|----------------------|------------------------|----------------------|----------------------|--------------------------------------|
| RV/TLC                              | Clinical<br>Diagnosis of<br>COPD | Respiratory<br>Medications                                                | Office Visits        | ER Visits            | Hospital<br>Admissions | ICU<br>Admissions    | Mortality            | COPD on<br>Follow-up<br>Spirometry § |
|                                     | HR                               | IRR                                                                       | IRR                  | IRR                  | IRR                    | IRR                  | HR                   | OR-Mixed Eff.                        |
| <b>Binary</b>                       |                                  |                                                                           |                      |                      |                        |                      |                      |                                      |
| <b>Single-Lung Function Model</b>   |                                  |                                                                           |                      |                      |                        |                      |                      |                                      |
| Model r <sup>2</sup>                | N/A                              | 0.01                                                                      | 0.06                 | 0.03                 | 0.03                   | 0.01                 | N/A                  | N/A                                  |
| High vs                             | <b>1.35</b>                      | <b>1.03</b>                                                               | <b>1.15</b>          | 1.08                 | <b>1.31</b>            | <b>1.28</b>          | <b>1.27</b>          | 0.93                                 |
| Low                                 | <b>(1.20-1.53)</b>               | <b>(1.01-1.05)</b>                                                        | <b>(1.13-1.18)</b>   | (0.97-1.20)          | <b>(1.21-1.42)</b>     | <b>(1.01-1.61)</b>   | <b>(1.12-1.44)</b>   | (0.68-1.29)                          |
|                                     | <b>p&lt;0.001</b>                | <b>p=0.001</b>                                                            | <b>p&lt;0.001</b>    | p=0.177              | <b>p&lt;0.001</b>      | <b>p=0.042</b>       | <b>p&lt;0.001</b>    | p=0.671                              |
| <b>Binary</b>                       |                                  |                                                                           |                      |                      |                        |                      |                      |                                      |
| <b>Multi-Lung Function Model</b>    |                                  | Includes FEV <sub>1</sub> /FVC, FEV <sub>1</sub> and FEF <sub>25-75</sub> |                      |                      |                        |                      |                      |                                      |
| Model r <sup>2</sup>                | N/A                              | 0.01                                                                      | 0.09                 | 0.05                 | 0.05                   | 0.04                 | N/A                  | N/A                                  |
| High vs                             | <b>1.27</b>                      | <b>0.98</b>                                                               | <b>1.07</b>          | 0.94                 | <b>1.18</b>            | 1.12                 | <b>1.21</b>          | 1.13                                 |
| Low                                 | <b>(1.12-1.44)</b>               | <b>(0.97-0.99)</b>                                                        | <b>(1.04-1.10)</b>   | (0.84-1.05)          | <b>(1.09-1.29)</b>     | (0.88-1.43)          | <b>(1.06-1.37)</b>   | (0.78-1.61)                          |
|                                     | <b>p&lt;0.001</b>                | <b>p=0.046</b>                                                            | <b>p&lt;0.001</b>    | p=0.297              | <b>p&lt;0.001</b>      | p=0.349              | <b>p=0.005</b>       | p=0.521                              |
| <b>Continuous</b>                   |                                  |                                                                           |                      |                      |                        |                      |                      |                                      |
| <b>Multi-Lung Function Model</b>    |                                  | Includes FEV <sub>1</sub> /FVC, FEV <sub>1</sub> and FEF <sub>25-75</sub> |                      |                      |                        |                      |                      |                                      |
| Model r <sup>2</sup>                | N/A                              | 0.01                                                                      | 0.09                 | 0.05                 | 0.05                   | 0.04                 | N/A                  | N/A                                  |
| RV/TLC                              | <b>1.034</b>                     | 1.001                                                                     | <b>1.015</b>         | <b>1.030</b>         | <b>1.036</b>           | <b>1.027</b>         | <b>1.026</b>         | 1.001                                |
| (%)                                 | <b>(1.021-1.048)</b>             | (0.999-1.003)                                                             | <b>(1.013-1.018)</b> | <b>(1.018-1.042)</b> | <b>(1.027-1.045)</b>   | <b>(1.001-1.053)</b> | <b>(1.013-1.038)</b> | (0.967-1.037)                        |
|                                     | <b>P&lt;0.001</b>                | p=0.104                                                                   | <b>p&lt;0.001</b>    | <b>p&lt;0.001</b>    | <b>p&lt;0.001</b>      | <b>p=0.039</b>       | <b>p&lt;0.001</b>    | p=0.939                              |

Footnote: Association of RV/TLC and respiratory-related healthcare outcomes with COPD diagnosis were estimated using Cox Proportional Hazards regression for time to outcomes, Poisson regression for counts of outcome, or mixed-effects (Mixed Eff.) logistic regression for binary outcomes with adjustment for age, sex, height, and years of follow-up: Healthcare Outcomes= $\beta_0+\beta_1(\text{age})+\beta_2(\text{sex})+\beta_3(\text{height})+\beta_4(\text{years of follow-up})+\beta_*(\text{lung function indices})$ . The models coefficients of determination (r<sup>2</sup>), Hazard Ratio (HR), Incident Rate Ratio (IRR), and Odds Ratio (OR) with 95% confidence interval and p-value of the predictors are shown in the

table. Significant associations are shown in bold. N =5,179 unless noted otherwise. § Follow-up spirometry (last available post-bronchodilator spirometry) was available for a subgroup of the patients, N =1,124, models were adjusted for time from index PFT to such follow-up spirometry instead of years of follow-up. Abbreviations- TLC: total lung capacity; RV: residual volume; FEV<sub>1</sub>: forced expiratory volume in 1 second; FVC: forced vital capacity; FEF<sub>25-75</sub>: maximum airflow at mid-lung volume.

**Table S5- Association of FRC and Health Outcomes.**

| Respiratory-related Health Outcomes |                                                        |                                                                           |                                                           |                                                        |                                                        |                                                        |                                                        |                                                        |
|-------------------------------------|--------------------------------------------------------|---------------------------------------------------------------------------|-----------------------------------------------------------|--------------------------------------------------------|--------------------------------------------------------|--------------------------------------------------------|--------------------------------------------------------|--------------------------------------------------------|
| FRC                                 | Clinical<br>Diagnosis of<br>COPD                       | Respiratory<br>Medications                                                | Office Visits                                             | ER Visits                                              | Hospital<br>Admissions                                 | ICU<br>Admissions                                      | Mortality                                              | COPD on<br>Follow-up<br>Spirometry §                   |
|                                     | HR                                                     | IRR                                                                       | IRR                                                       | IRR                                                    | IRR                                                    | IRR                                                    | HR                                                     | OR-Mixed Eff.                                          |
| <b>Binary</b>                       |                                                        |                                                                           |                                                           |                                                        |                                                        |                                                        |                                                        |                                                        |
| <b>Single-Lung Function Model</b>   |                                                        |                                                                           |                                                           |                                                        |                                                        |                                                        |                                                        |                                                        |
| Model r <sup>2</sup>                | N/A                                                    | 0.01                                                                      | 0.05                                                      | 0.03                                                   | 0.03                                                   | 0.02                                                   | N/A                                                    | N/A                                                    |
| <b>Abnormal<br/>vs Normal</b>       | <b>1.59</b><br><b>(1.31-1.92)</b><br><b>p&lt;0.001</b> | <b>0.94</b><br><b>(0.91-0.97)</b><br><b>p&lt;0.001</b>                    | <b>1.37</b><br><b>(1.33-1.42)</b><br><b>p&lt;0.001</b>    | 0.95<br>(0.78-1.15)<br>p=0.586                         | <b>1.77</b><br><b>(1.59-1.96)</b><br><b>p&lt;0.001</b> | 1.34<br>(0.95-1.87)<br>p=0.095                         | <b>1.45</b><br><b>(1.21-1.73)</b><br><b>p&lt;0.001</b> | <b>2.44</b><br><b>(1.53-3.89)</b><br><b>p&lt;0.001</b> |
| <b>Binary</b>                       |                                                        |                                                                           |                                                           |                                                        |                                                        |                                                        |                                                        |                                                        |
| <b>Multi-Lung Function Model</b>    |                                                        | Includes FEV <sub>1</sub> /FVC, FEV <sub>1</sub> and FEF <sub>25-75</sub> |                                                           |                                                        |                                                        |                                                        |                                                        |                                                        |
| Model r <sup>2</sup>                | N/A                                                    | 0.01                                                                      | 0.08                                                      | 0.05                                                   | 0.05                                                   | 0.04                                                   | N/A                                                    | N/A                                                    |
| <b>Abnormal<br/>vs Normal</b>       | <b>1.53</b><br><b>(1.26-1.86)</b><br><b>p&lt;0.001</b> | <b>0.96</b><br><b>(0.93-0.99)</b><br><b>p=0.011</b>                       | <b>1.39</b><br><b>(1.34-1.44)</b><br><b>p&lt;0.001</b>    | 0.97<br>(0.80-1.18)<br>p=0.749                         | <b>1.80</b><br><b>(1.62-2.01)</b><br><b>p&lt;0.001</b> | 1.36<br>(0.97-1.92)<br>p=0.077                         | <b>1.57</b><br><b>(1.31-1.88)</b><br><b>p&lt;0.001</b> | <b>1.88</b><br><b>(1.14-3.09)</b><br><b>p=0.014</b>    |
| <b>Continuous</b>                   |                                                        |                                                                           |                                                           |                                                        |                                                        |                                                        |                                                        |                                                        |
| <b>Multi-Lung Function Model</b>    |                                                        | Includes FEV <sub>1</sub> /FVC, FEV <sub>1</sub> and FEF <sub>25-75</sub> |                                                           |                                                        |                                                        |                                                        |                                                        |                                                        |
| Model r <sup>2</sup>                | N/A                                                    | 0.02                                                                      | 0.09                                                      | 0.05                                                   | 0.05                                                   | 0.04                                                   | N/A                                                    | N/A                                                    |
| <b>FRC (L)</b>                      | <b>1.27</b><br><b>(1.19-1.35)</b><br><b>P&lt;0.001</b> | <b>0.95</b><br><b>(0.94-0.96)</b><br><b>p&lt;0.001</b>                    | <b>1.173</b><br><b>(1.159-1.186)</b><br><b>p&lt;0.001</b> | <b>1.105</b><br><b>(1.044-1.169)</b><br><b>p=0.001</b> | <b>1.32</b><br><b>(1.27-1.37)</b><br><b>p&lt;0.001</b> | <b>1.29</b><br><b>(1.16-1.44)</b><br><b>p&lt;0.001</b> | <b>1.33</b><br><b>(1.25-1.41)</b><br><b>p&lt;0.001</b> | <b>1.35</b><br><b>(1.14-1.59)</b><br><b>p&lt;0.001</b> |

Footnote: Association of FRC and respiratory-related healthcare outcomes with COPD diagnosis were estimated using Cox Proportional Hazards regression for time to outcomes, Poisson regression for counts of outcome, or mixed-effects (Mixed Eff.) logistic regression for binary outcomes with adjustment for age, sex, height, and years of follow-up: Healthcare Outcomes= $\beta_0+\beta_1(\text{age})+\beta_2(\text{sex})+\beta_3(\text{height})+\beta_4(\text{years of follow-up})+\beta_*(\text{lung function indices})$ . The models coefficients of determination ( $r^2$ ), Hazard Ratio (HR), Incident Rate Ratio (IRR), and Odds Ratio (OR) with 95% confidence interval and p-value of the predictors are shown in the table. Significant associations are shown in bold. N =6,351 unless noted otherwise. § Follow-up spirometry (last available post-bronchodilator spirometry) was available for a subgroup of the patients, N =1,502, models were adjusted for time from index PFT to such follow-up spirometry



instead of years of follow-up. Abbreviations- FRC: functional residual capacity; FEV<sub>1</sub>: forced expiratory volume in 1 second; FVC: forced vital capacity; FEF<sub>25-75</sub>: maximum airflow at mid-lung volume.

**Table S6- Association of FRC/TLC and Health Outcomes.**

| Respiratory-related Health Outcomes          |                                          |                                                                           |                                          |                                          |                                          |                                          |                                          |                                      |
|----------------------------------------------|------------------------------------------|---------------------------------------------------------------------------|------------------------------------------|------------------------------------------|------------------------------------------|------------------------------------------|------------------------------------------|--------------------------------------|
| FRC/TLC<br>(Quanjer<br>Predicted<br>Formula) | Clinical<br>Diagnosis of<br>COPD         | Respiratory<br>Medications                                                | Office Visits                            | ER Visits                                | Hospital<br>Admissions                   | ICU<br>Admissions                        | Mortality                                | COPD on<br>Follow-up<br>Spirometry § |
|                                              | HR                                       | IRR                                                                       | IRR                                      | IRR                                      | IRR                                      | IRR                                      | HR                                       | OR-Mixed Eff.                        |
| <b>Binary</b>                                |                                          |                                                                           |                                          |                                          |                                          |                                          |                                          |                                      |
| <b>Single-Lung Function Model</b>            |                                          |                                                                           |                                          |                                          |                                          |                                          |                                          |                                      |
| Model r <sup>2</sup>                         | N/A                                      | 0.01                                                                      | 0.05                                     | 0.04                                     | 0.03                                     | 0.02                                     | N/A                                      | N/A                                  |
| Abnormal<br>vs Normal                        | <b>1.45</b><br>(1.17-1.78)<br>p=0.001    | 0.98<br>(0.95-1.01)<br>p=0.276                                            | <b>1.46</b><br>(1.41-1.52)<br>p<0.001    | <b>1.89</b><br>(1.63-2.19)<br>p<0.001    | <b>1.96</b><br>(1.76-2.18)<br>p<0.001    | <b>2.14</b><br>(1.59-2.86)<br>p<0.001    | <b>1.33</b><br>(1.10-1.61)<br>p=0.003    | 1.45<br>(0.86-2.44)<br>p=0.164       |
| <b>Binary</b>                                |                                          |                                                                           |                                          |                                          |                                          |                                          |                                          |                                      |
| <b>Multi-Lung Function Model</b>             |                                          | Includes FEV <sub>1</sub> /FVC, FEV <sub>1</sub> and FEF <sub>25-75</sub> |                                          |                                          |                                          |                                          |                                          |                                      |
| Model r <sup>2</sup>                         | N/A                                      | 0.01                                                                      | 0.08                                     | 0.05                                     | 0.05                                     | 0.04                                     | N/A                                      | N/A                                  |
| Abnormal<br>vs Normal                        | <b>1.31</b><br>(1.06-1.61)<br>p=0.012    | <b>0.96</b><br>(0.93-0.99)<br>p=0.019                                     | <b>1.39</b><br>(1.34-1.44)<br>p<0.001    | <b>1.80</b><br>(1.55-2.08)<br>p<0.001    | <b>1.85</b><br>(1.66-2.06)<br>p<0.001    | <b>1.92</b><br>(1.43-2.59)<br>p<0.001    | <b>1.32</b><br>(1.09-1.60)<br>p=0.004    | 1.03<br>(0.59-1.80)<br>p=0.911       |
| <b>Continuous</b>                            |                                          |                                                                           |                                          |                                          |                                          |                                          |                                          |                                      |
| <b>Multi-Lung Function Model</b>             |                                          | Includes FEV <sub>1</sub> /FVC, FEV <sub>1</sub> and FEF <sub>25-75</sub> |                                          |                                          |                                          |                                          |                                          |                                      |
| Model r <sup>2</sup>                         | N/A                                      | 0.02                                                                      | 0.08                                     | 0.05                                     | 0.05                                     | 0.04                                     | N/A                                      | N/A                                  |
| FRC/TLC<br>(%)                               | <b>1.016</b><br>(1.010-1.022)<br>P<0.001 | <b>0.994</b><br>(0.993-0.995)<br>p<0.001                                  | <b>1.014</b><br>(1.013-1.015)<br>p<0.001 | <b>1.019</b><br>(1.014-1.024)<br>p<0.001 | <b>1.025</b><br>(1.021-1.029)<br>p<0.001 | <b>1.025</b><br>(1.014-0.035)<br>p<0.001 | <b>1.025</b><br>(1.019-1.031)<br>p<0.001 | 1.010<br>(0.994-1.026)<br>p=0.236    |

Footnote: Association of FRC/TLC and respiratory-related healthcare outcomes with COPD diagnosis were estimated using Cox Proportional Hazards regression for time to outcomes, Poisson regression for counts of outcome, or mixed-effects (Mixed Eff.) logistic regression for binary outcomes with adjustment for age, sex, height, and years of follow-up: Healthcare Outcomes= $\beta_0+\beta_1(\text{age})+\beta_2(\text{sex})+\beta_3(\text{height})+\beta_4(\text{years of follow-up})+\beta_*(\text{lung function indices})$ . The models coefficients of determination (r<sup>2</sup>), Hazard Ratio (HR), Incident Rate Ratio (IRR), and Odds Ratio (OR) with 95% confidence interval and p-value of the predictors are shown in the table. Significant associations are shown in bold. N =6,351 unless noted otherwise. § Follow-up spirometry (last available post-bronchodilator spirometry) was available for a subgroup of the

patients, N =1,502, models were adjusted for time from index PFT to such follow-up spirometry instead of years of follow-up. Abbreviations- TLC: total lung capacity; FRC: functional residual capacity; FEV<sub>1</sub>: forced expiratory volume in 1 second; FVC: forced vital capacity; FEF<sub>25-75</sub>: maximum airflow at mid-lung volume.

**Table S7- Association of IC and Health Outcomes.**

| Respiratory-related Health Outcomes         |                                                                           |                                       |                                       |                                       |                                       |                                       |                                       |                                 |
|---------------------------------------------|---------------------------------------------------------------------------|---------------------------------------|---------------------------------------|---------------------------------------|---------------------------------------|---------------------------------------|---------------------------------------|---------------------------------|
| IC(Quanjer Predicted Formula)               | Clinical Diagnosis of COPD                                                | Respiratory Medications               | Office Visits                         | ER Visits                             | Hospital Admissions                   | ICU Admissions                        | Mortality                             | COPD on Follow-up Spirometry §  |
|                                             | HR                                                                        | IRR                                   | IRR                                   | IRR                                   | IRR                                   | IRR                                   | HR                                    | OR-Mixed Eff.                   |
| <b>Binary Single-Lung Function Model</b>    |                                                                           |                                       |                                       |                                       |                                       |                                       |                                       |                                 |
| Model r <sup>2</sup>                        | N/A                                                                       | 0.01                                  | 0.05                                  | 0.03                                  | 0.03                                  | 0.02                                  | N/A                                   | N/A                             |
| Abnormal vs Normal                          | <b>1.13</b><br>(1.02-1.25)<br>p=0.022                                     | <b>0.94</b><br>(0.93-0.95)<br>p<0.001 | <b>1.22</b><br>(1.20-1.25)<br>p<0.001 | <b>1.27</b><br>(1.16-1.40)<br>p<0.001 | <b>1.26</b><br>(1.18-1.35)<br>p<0.001 | <b>1.34</b><br>(1.11-1.63)<br>p=0.003 | <b>1.53</b><br>(1.38-1.70)<br>p<0.001 | 0.96<br>(0.774-1.25)<br>p=0.765 |
| <b>Binary Multi-Lung Function Model</b>     |                                                                           |                                       |                                       |                                       |                                       |                                       |                                       |                                 |
|                                             | Includes FEV <sub>1</sub> /FVC, FEV <sub>1</sub> and FEF <sub>25-75</sub> |                                       |                                       |                                       |                                       |                                       |                                       |                                 |
| Model r <sup>2</sup>                        | N/A                                                                       | 0.02                                  | 0.08                                  | 0.05                                  | 0.04                                  | 0.04                                  | N/A                                   | N/A                             |
| Abnormal vs Normal                          | 1.03<br>(0.92-1.15)<br>p=0.601                                            | <b>0.90</b><br>(0.89-0.92)<br>p<0.001 | <b>1.13</b><br>(1.10-1.15)<br>p<0.001 | <b>1.18</b><br>(1.07-1.30)<br>p=0.001 | <b>1.17</b><br>(1.09-1.25)<br>p<0.001 | 1.17<br>(0.96-1.43)<br>p=0.124        | <b>1.45</b><br>(1.30-1.62)<br>p<0.001 | 1.03<br>(0.78-1.38)<br>p=0.817  |
| <b>Continuous Multi-Lung Function Model</b> |                                                                           |                                       |                                       |                                       |                                       |                                       |                                       |                                 |
|                                             | Includes FEV <sub>1</sub> /FVC, FEV <sub>1</sub> and FEF <sub>25-75</sub> |                                       |                                       |                                       |                                       |                                       |                                       |                                 |
| Model r <sup>2</sup>                        | N/A                                                                       | 0.02                                  | 0.08                                  | 0.05                                  | 0.05                                  | 0.04                                  | N/A                                   | N/A                             |
| IC (L)                                      | 0.93<br>(0.85-1.01)<br>p=0.100                                            | <b>1.08</b><br>(1.07-1.09)<br>p<0.001 | <b>0.88</b><br>(0.87-0.90)<br>p<0.001 | <b>0.71</b><br>(0.65-0.77)<br>p<0.001 | <b>0.77</b><br>(0.72-0.81)<br>p<0.001 | <b>0.80</b><br>(0.68-0.94)<br>p=0.007 | <b>0.76</b><br>(0.70-0.83)<br>p<0.001 | 1.18<br>(0.93-1.48)<br>p=0.170  |

Footnote: Association of IC and respiratory-related healthcare outcomes with COPD diagnosis

were estimated using Cox Proportional Hazards regression for time to outcomes, Poisson

regression for counts of outcome, or mixed-effects (Mixed Eff.) logistic regression for binary

outcomes with adjustment for age, sex, height, and years of follow-up: Healthcare

Outcomes= $\beta_0 + \beta_1(\text{age}) + \beta_2(\text{sex}) + \beta_3(\text{height}) + \beta_4(\text{years of follow-up}) + \beta_*(\text{lung function indices})$ .

The models coefficients of determination (r<sup>2</sup>), Hazard Ratio (HR), Incident Rate Ratio (IRR), and

Odds Ratio (OR) with 95% confidence interval and p-value of the predictors are shown in the

table. Significant associations are shown in bold. N =6,346 unless noted otherwise. § Follow-up

spirometry (last available post-bronchodilator spirometry) was available for a subgroup of the

patients, N =1,499, models were adjusted for time from index PFT to such follow-up spirometry

instead of years of follow-up. Abbreviations- TLC: total lung capacity; IC: inspiratory capacity; FEV<sub>1</sub>: forced expiratory volume in 1 second; FVC: forced vital capacity; FEF<sub>25-75</sub>: maximum airflow at mid-lung volume.

**Table S8- Association of IC/TLC and Health Outcomes.**

| Respiratory-related Health Outcomes           |                                          |                                                                           |                                          |                                          |                                          |                                          |                                          |                                       |
|-----------------------------------------------|------------------------------------------|---------------------------------------------------------------------------|------------------------------------------|------------------------------------------|------------------------------------------|------------------------------------------|------------------------------------------|---------------------------------------|
| IC/TLC<br>(Francisco<br>Predicted<br>Formula) | Clinical<br>Diagnosis of<br>COPD         | Respiratory<br>Medications                                                | Office Visits                            | ER Visits                                | Hospital<br>Admissions                   | ICU<br>Admissions                        | Mortality                                | COPD on<br>Follow-up<br>Spirometry §  |
|                                               | HR                                       | IRR                                                                       | IRR                                      | IRR                                      | IRR                                      | IRR                                      | HR                                       | OR-Mixed Eff.                         |
| <b>Binary</b>                                 |                                          |                                                                           |                                          |                                          |                                          |                                          |                                          |                                       |
| <b>Single-Lung Function Model</b>             |                                          |                                                                           |                                          |                                          |                                          |                                          |                                          |                                       |
| Model r <sup>2</sup>                          | N/A                                      | 0.01                                                                      | 0.05                                     | 0.04                                     | 0.03                                     | 0.02                                     | N/A                                      | N/A                                   |
| Abnormal<br>vs Normal                         | <b>1.48</b><br>(1.32-1.66)<br>p<0.001    | <b>0.92</b><br>(0.91-0.94)<br>p<0.001                                     | <b>1.37</b><br>(1.34-1.40)<br>p<0.001    | <b>1.53</b><br>(1.37-1.70)<br>p<0.001    | <b>1.75</b><br>(1.62-1.88)<br>p<0.001    | <b>1.64</b><br>(1.33-2.03)<br>p<0.001    | <b>1.44</b><br>(1.27-1.63)<br>p<0.001    | <b>1.51</b><br>(1.13-2.02)<br>p=0.005 |
| <b>Binary</b>                                 |                                          |                                                                           |                                          |                                          |                                          |                                          |                                          |                                       |
| <b>Multi-Lung Function Model</b>              |                                          | Includes FEV <sub>1</sub> /FVC, FEV <sub>1</sub> and FEF <sub>25-75</sub> |                                          |                                          |                                          |                                          |                                          |                                       |
| Model r <sup>2</sup>                          | N/A                                      | 0.02                                                                      | 0.08                                     | 0.05                                     | 0.05                                     | 0.04                                     | N/A                                      | N/A                                   |
| Abnormal<br>vs Normal                         | <b>1.36</b><br>(1.21-1.53)<br>p<0.001    | <b>0.91</b><br>(0.90-0.93)<br>p<0.001                                     | <b>1.30</b><br>(1.27-1.33)<br>p<0.001    | <b>1.48</b><br>(1.33-1.64)<br>p<0.001    | <b>1.67</b><br>(1.55-1.80)<br>p<0.001    | <b>1.51</b><br>(1.22-1.87)<br>p<0.001    | <b>1.46</b><br>(1.28-1.65)<br>p<0.001    | 1.19<br>(0.88-1.63)<br>p=0.263        |
| <b>Continuous</b>                             |                                          |                                                                           |                                          |                                          |                                          |                                          |                                          |                                       |
| <b>Multi-Lung Function Model</b>              |                                          | Includes FEV <sub>1</sub> /FVC, FEV <sub>1</sub> and FEF <sub>25-75</sub> |                                          |                                          |                                          |                                          |                                          |                                       |
| Model r <sup>2</sup>                          | N/A                                      | 0.02                                                                      | 0.08                                     | 0.05                                     | 0.05                                     | 0.04                                     | N/A                                      | N/A                                   |
| IC/TLC<br>(%)                                 | <b>0.983</b><br>(0.976-0.989)<br>P<0.001 | <b>1.0057</b><br>(1.005-1.006)<br>p<0.001                                 | <b>0.986</b><br>(0.985-0.987)<br>p<0.001 | <b>0.980</b><br>(0.975-0.985)<br>p<0.001 | <b>0.974</b><br>(0.970-0.977)<br>p<0.001 | <b>0.974</b><br>(0.963-0.984)<br>p<0.001 | <b>0.974</b><br>(0.969-0.980)<br>p<0.001 | 0.989<br>(0.973-1.004)<br>p=0.166     |

Footnote: Association of IC/TLC and respiratory-related healthcare outcomes with COPD diagnosis were estimated using Cox Proportional Hazards regression for time to outcomes, Poisson regression for counts of outcome, or mixed-effects (Mixed Eff.) logistic regression for binary outcomes with adjustment for age, sex, height, and years of follow-up: Healthcare Outcomes= $\beta_0+\beta_1(\text{age})+\beta_2(\text{sex})+\beta_3(\text{height})+\beta_4(\text{years of follow-up})+\beta_*(\text{lung function indices})$ . The models coefficients of determination (r<sup>2</sup>), Hazard Ratio (HR), Incident Rate Ratio (IRR), and Odds Ratio (OR) with 95% confidence interval and p-value of the predictors are shown in the table. Significant associations are shown in bold. N =6,346 unless otherwise noted. § Follow-up spirometry (last available post-bronchodilator spirometry) was available for a subgroup of the

patients, N =1,493, models were adjusted for time from index PFT to such follow-up spirometry instead of years of follow-up. Abbreviations- TLC: total lung capacity; IC: inspiratory capacity; FEV<sub>1</sub>: forced expiratory volume in 1 second; FVC: forced vital capacity; FEF<sub>25-75</sub>: maximum airflow at mid-lung volume.

**Table S9- Association of RV/TLC and Health Outcomes using GOLD criteria for diagnosis of COPD and determination of preserved spirometry.**

| Respiratory-related Health Outcomes |                                                           |                                                                           |                                                           |                                                        |                                                           |                                                        |                                                           | GOLD                                                   |
|-------------------------------------|-----------------------------------------------------------|---------------------------------------------------------------------------|-----------------------------------------------------------|--------------------------------------------------------|-----------------------------------------------------------|--------------------------------------------------------|-----------------------------------------------------------|--------------------------------------------------------|
| RV/TLC                              | Clinical<br>Diagnosis of<br>COPD                          | Respiratory<br>Medications                                                | Office Visits                                             | ER Visits                                              | Hospital<br>Admissions                                    | ICU<br>Admissions                                      | Mortality                                                 | COPD on<br>Follow-up<br>Spirometry §                   |
|                                     | HR                                                        | IRR                                                                       | IRR                                                       | IRR                                                    | IRR                                                       | IRR                                                    | HR                                                        | OR-Mixed Eff.                                          |
| <b>Binary</b>                       |                                                           |                                                                           |                                                           |                                                        |                                                           |                                                        |                                                           |                                                        |
| <b>Single-Lung Function Model</b>   |                                                           |                                                                           |                                                           |                                                        |                                                           |                                                        |                                                           |                                                        |
| Model r <sup>2</sup>                | N/A                                                       | 0.01                                                                      | 0.05                                                      | 0.02                                                   | 0.03                                                      | 0.02                                                   | N/A                                                       | N/A                                                    |
| <b>Abnormal</b><br><b>vs Normal</b> | <b>1.50</b><br><b>(1.37-1.64)</b><br><b>p&lt;0.001</b>    | <b>1.13</b><br><b>(1.11-1.14)</b><br><b>p&lt;0.001</b>                    | <b>1.31</b><br><b>(1.28-1.33)</b><br><b>p&lt;0.001</b>    | <b>1.10</b><br><b>(1.02-1.20)</b><br><b>p=0.020</b>    | <b>1.50</b><br><b>(1.41-1.58)</b><br><b>p&lt;0.001</b>    | <b>1.31</b><br><b>(1.11-1.54)</b><br><b>p=0.002</b>    | <b>1.25</b><br><b>(1.15-1.37)</b><br><b>p&lt;0.001</b>    | <b>1.26</b><br><b>(1.003-1.59)</b><br><b>p=0.047</b>   |
| <b>Binary</b>                       |                                                           |                                                                           |                                                           |                                                        |                                                           |                                                        |                                                           |                                                        |
| <b>Multi-Lung Function Model</b>    |                                                           | Includes FEV <sub>1</sub> /FVC, FEV <sub>1</sub> and FEF <sub>25-75</sub> |                                                           |                                                        |                                                           |                                                        |                                                           |                                                        |
| Model r <sup>2</sup>                | N/A                                                       | 0.01                                                                      | 0.08                                                      | 0.04                                                   | 0.05                                                      | 0.04                                                   | N/A                                                       | N/A                                                    |
| <b>Abnormal</b><br><b>vs Normal</b> | <b>1.37</b><br><b>(1.24-1.50)</b><br><b>p&lt;0.001</b>    | <b>1.08</b><br><b>(1.07-1.10)</b><br><b>p&lt;0.001</b>                    | <b>1.18</b><br><b>(1.16-1.20)</b><br><b>p&lt;0.001</b>    | 0.97<br>(0.89-1.05)<br>p=0.425                         | <b>1.35</b><br><b>(1.27-1.43)</b><br><b>p&lt;0.001</b>    | 1.09<br>(0.92-1.29)<br>p=0.326                         | <b>1.16</b><br><b>(1.06-1.28)</b><br><b>p=0.002</b>       | 1.30<br>(0.996-1.692)<br>p=0.054                       |
| <b>Continuous</b>                   |                                                           |                                                                           |                                                           |                                                        |                                                           |                                                        |                                                           |                                                        |
| <b>Multi-Lung Function Model</b>    |                                                           | Includes FEV <sub>1</sub> /FVC, FEV <sub>1</sub> and FEF <sub>25-75</sub> |                                                           |                                                        |                                                           |                                                        |                                                           |                                                        |
| Model r <sup>2</sup>                | N/A                                                       | 0.01                                                                      | 0.08                                                      | 0.04                                                   | 0.05                                                      | 0.04                                                   | N/A                                                       | N/A                                                    |
| <b>RV/TLC</b><br><b>(%)</b>         | <b>1.030</b><br><b>(1.023-1.037)</b><br><b>P&lt;0.001</b> | <b>1.006</b><br><b>(1.005-1.007)</b><br><b>p&lt;0.001</b>                 | <b>1.018</b><br><b>(1.016-1.019)</b><br><b>p&lt;0.001</b> | <b>1.008</b><br><b>(1.002-1.014)</b><br><b>p=0.011</b> | <b>1.033</b><br><b>(1.029-1.037)</b><br><b>p&lt;0.001</b> | <b>1.016</b><br><b>(1.004-1.029)</b><br><b>p=0.009</b> | <b>1.014</b><br><b>(1.007-1.021)</b><br><b>p&lt;0.001</b> | <b>1.019</b><br><b>(1.001-1.038)</b><br><b>p=0.043</b> |

Footnote: Association of RV/TLC and respiratory-related healthcare outcomes with COPD diagnosis were estimated using Cox Proportional Hazards regression for time to outcomes, Poisson regression for counts of outcome, or mixed-effects (Mixed Eff.) logistic regression for binary outcomes with adjustment for age, sex, height, and years of follow-up: Healthcare Outcomes= $\beta_0+\beta_1(\text{age})+\beta_2(\text{sex})+\beta_3(\text{height})+\beta_4(\text{years of follow-up})+\beta_*(\text{lung function indices})$ . The models coefficients of determination (r<sup>2</sup>), Hazard Ratio (HR), Incident Rate Ratio (IRR), and Odds Ratio (OR) with 95% confidence interval and p-value of the predictors are shown in the table. Significant associations are shown in bold. N =7,360 unless noted otherwise. § Follow-up spirometry (last available post-bronchodilator spirometry) was available for a subgroup of the



patients, N =1,675, models were adjusted for time from index PFT to such follow-up spirometry instead of years of follow-up. Abbreviations- TLC: total lung capacity; RV: residual volume; FEV<sub>1</sub>: forced expiratory volume in 1 second; FVC: forced vital capacity; FEF<sub>25-75</sub>: maximum airflow at mid-lung volume.

**Table S10- Correlation of RV/TLC with Airflow Indices (Absolute Values).**

|                            | Uncorrected Correlation with<br>RV/TLC (%) |         | Corrected Correlation with<br>RV/TLC (%) |         |
|----------------------------|--------------------------------------------|---------|------------------------------------------|---------|
|                            | r                                          | p-value | r <sub>p</sub>                           | p-value |
| Correlation w RV/TLC (%)   |                                            |         |                                          |         |
| FEV <sub>1</sub> /FVC (%)  | -0.16                                      | <0.001  | -0.04                                    | <0.001  |
| FEV <sub>1</sub> (L)       | -0.53                                      | <0.001  | -0.34                                    | <0.001  |
| FEF <sub>25-75</sub> (L/s) | -0.36                                      | <0.001  | -0.11                                    | <0.001  |
| FVC (L)                    | -0.48                                      | <0.001  | -0.30                                    | <0.001  |
| FRC (L)                    | 0.42                                       | <0.001  | 0.52                                     | <0.001  |
| FRC/TLC (%)                | 0.48                                       | <0.001  | 0.38                                     | <0.001  |
| IC (L)                     | -0.29                                      | <0.001  | -0.09                                    | <0.001  |
| IC/TLC (%)                 | -0.48                                      | <0.001  | -0.39                                    | <0.001  |

Footnote: Partial and semi-partial correlation coefficients were tested among airflow indices and RV/TLC controlling for age, height, and sex in the cohort with preserved spirometry. N = 7,479.

Abbreviations- r: correlation coefficient; r<sub>p</sub>: Partial correlation, which is the correlation coefficient between dependent variable and the targeted independent variable assuming the other independent variables did not vary; FEV<sub>1</sub>: forced expiratory volume in 1 second; FVC: forced vital capacity; TLC: total lung capacity; RV: residual volume; FEF<sub>25-75</sub>: maximum airflow at mid-lung volume; IC: inspiratory capacity; FRC: functional residual capacity.

**Table S11 - Correlation of RV/TLC with Airflow Indices (% predicted).**

| Correlation w RV/TLC (% predicted)  | r     | p-value |
|-------------------------------------|-------|---------|
| FEV <sub>1</sub> /FVC (% predicted) | -0.05 | <0.001  |
| FEV <sub>1</sub> (% predicted)      | -0.36 | <0.001  |
| FVC (% predicted)                   | -0.31 | <0.001  |
| FRC (% predicted)                   | 0.53  | <0.001  |
| FRC/TLC (% predicted)               | 0.37  | <0.001  |
| IC (% predicted)                    | -0.10 | <0.001  |
| IC/TLC (% predicted)                | -0.31 | <0.001  |

Footnote: Correlation coefficients were tested among FEV<sub>1</sub>/FVC % predicted, FEV<sub>1</sub> % predicted, and RV/TLC % predicted. Abbreviations- r: correlation coefficient; FEV<sub>1</sub>: forced expiratory volume in 1 second; FVC: forced vital capacity; TLC: total lung capacity; RV: residual volume; IC: inspiratory capacity; FRC: functional residual capacity.

## 6. Detailed Definition of Outcomes

### Outcomes

Clinical diagnosis of COPD: Patients with documented diagnoses of ICD-9 or ICD-10 codes of “COPD,” “Chronic Obstructive Lung Disease,” “Emphysema,” “Pulmonary Emphysema,” “Chronic bronchitis,” “Obstructive chronic bronchitis,” “Chronic airway obstruction,” “Chronic bullous emphysema” were classified to have clinical diagnoses of COPD. Date and existence of a clinical COPD diagnosis given by a physician on patients’ problem list on electronic medical record were extracted for analysis.

Respiratory medications prescribed: number of prescribed respiratory medications recorded in electronic health record including ICS, LABA, LAMA, SABA, and SAMA (categories provided below).

Office Visits: number of outpatient visits, unrelated to the emergency department, associated with a Clinical diagnosis of COPD.

ER Visits: number of outpatient visits to the emergency department associated with a Clinical diagnosis of COPD.

Hospital admissions: number of inpatient admissions, independent from ICU, associated with a Clinical diagnosis of COPD.

ICU admissions: number of ICU admissions associated with a Clinical diagnosis of COPD.

Respiratory related illness: illness that resulted in an ER visit, hospital or ICU admission with a Clinical diagnosis of COPD.

### Medication Categories

#### ICS: Inhaled Corticosteroid (alone or in combination)

- Budesonide/formoterol fumarate inhaler
  - i. Symbicort
- Formoterol/mometasone inhaler
  - i. Dulera
- Fluticasone/Salmeterol xinafoate inhaler
  - i. Advair Diskus or Advair HFA
- Mometasone furoate inhaler
  - i. Asmanex Twisthaler
- Fluticasone propionate inhaler
  - i. Flovent Diskus or Flovent HFA
- Beclomethasone dipropionate inhaler

- i. QVAR
- Budesonide inhaler
  - i. Pulmicort respules or pulmicort Flexhaler
- Triamcinolone acetonide inhaler
  - i. Azmacort
- Flunisolide
  - i. Aerobid
  - ii. Aerospan HFA

LABA: Long Acting Beta Agonist (or in combination with ICS above)

- Formoterol fumarate
  - i. Foradil, Perforomist
- Salmeterol Xinafoate
  - i. Serevent diskus
- Arformoterol tartare
  - i. Brovana

LAMA: Long Acting Muscarinic Antagonist

- Tiotropium Bromide
  - i. Spiriva
- Acclidinium bromide
  - i. Tudorza

SABA: Short Acting Beta Agonist

- Albuterol Sulfate
  - i. ProAir, Proventil, Ventolin
- Levalbuterol HCl
  - i. Xopenex

SAMA: Short Acting Muscarinic Antagonist

- Ipratropium
  - i. Atrovent
  - ii. Apovent

## 7. References

1. ICD-10 Data. 2017. at [http://www.icd10data.com/.](http://www.icd10data.com/))
2. Crapo RO, Morris AH, Gardner RM. Reference spirometric values using techniques and equipment that meet ATS recommendations. *Am Rev Respir Dis* 1981;123:659-64.
3. Quanjer PH, Tammeling GJ, Cotes JE, Pedersen OF, Peslin R, Yernault JC. Lung volumes and forced ventilatory flows. Report Working Party Standardization of Lung Function Tests, European Community for Steel and Coal. Official Statement of the European Respiratory Society. *Eur Respir J Suppl* 1993;16:5-40.
4. Francisco LM, Salinas VH, Brown KE, et al. PD-L1 regulates the development, maintenance, and function of induced regulatory T cells. *J Exp Med* 2009;206:3015-29.
